# Supplementary material for: LC-MS/MS-QTOF dataset of chemical compounds detected in honey samples from Bali and Lombok, Indonesia
Source: Research Square preprint supplement (doi:10.21203/rs.3.rs-3456469/v1), 2023-10-20
Supplement: Supplementary file 1 [file 5e3228d3e344d41740df1001.docx]

**Table 1** An overview of data files

| **Label** | **Name of data file/data** | **types (file extension)** | **Data repository and identifier (DOI or accession n)** |
| --- | --- | --- | --- |
| Data file 1 | Chemical compound identified in B1 (Lombok Island) | pdf | Mendeley Data repository  Doi. 10.17632/8wtn82v7wg.3 |
| Data file 2 | Chemical compound identified in B2 (Bali) | Pdf | Mendeley Data repository  Doi. 10.17632/8wtn82v7wg.3 |
| Data file 3 | Chemical compound identified in B3 (Bali) | pdf | Mendeley Data repository  Doi. 10.17632/8wtn82v7wg.3 |
